# Supplementary material for: Targeting tumor cell plasticity by combined inhibition of NOTCH and MAPK signaling in colon cancer
Source: PubMed Central journal article supplement — J Exp Med. 2018 Jun 4;215(6):1693–708. doi: 10.1084/jem.20171455 (PMC5987917; doi:10.1084/jem.20171455), 2018-06-04
Supplement: JEM_20171455_sm.pdf [file JEM_20171455_sm.pdf]

Supplemental material

Schmidt et al., <https://doi.org/10.1084/jem.20171455>

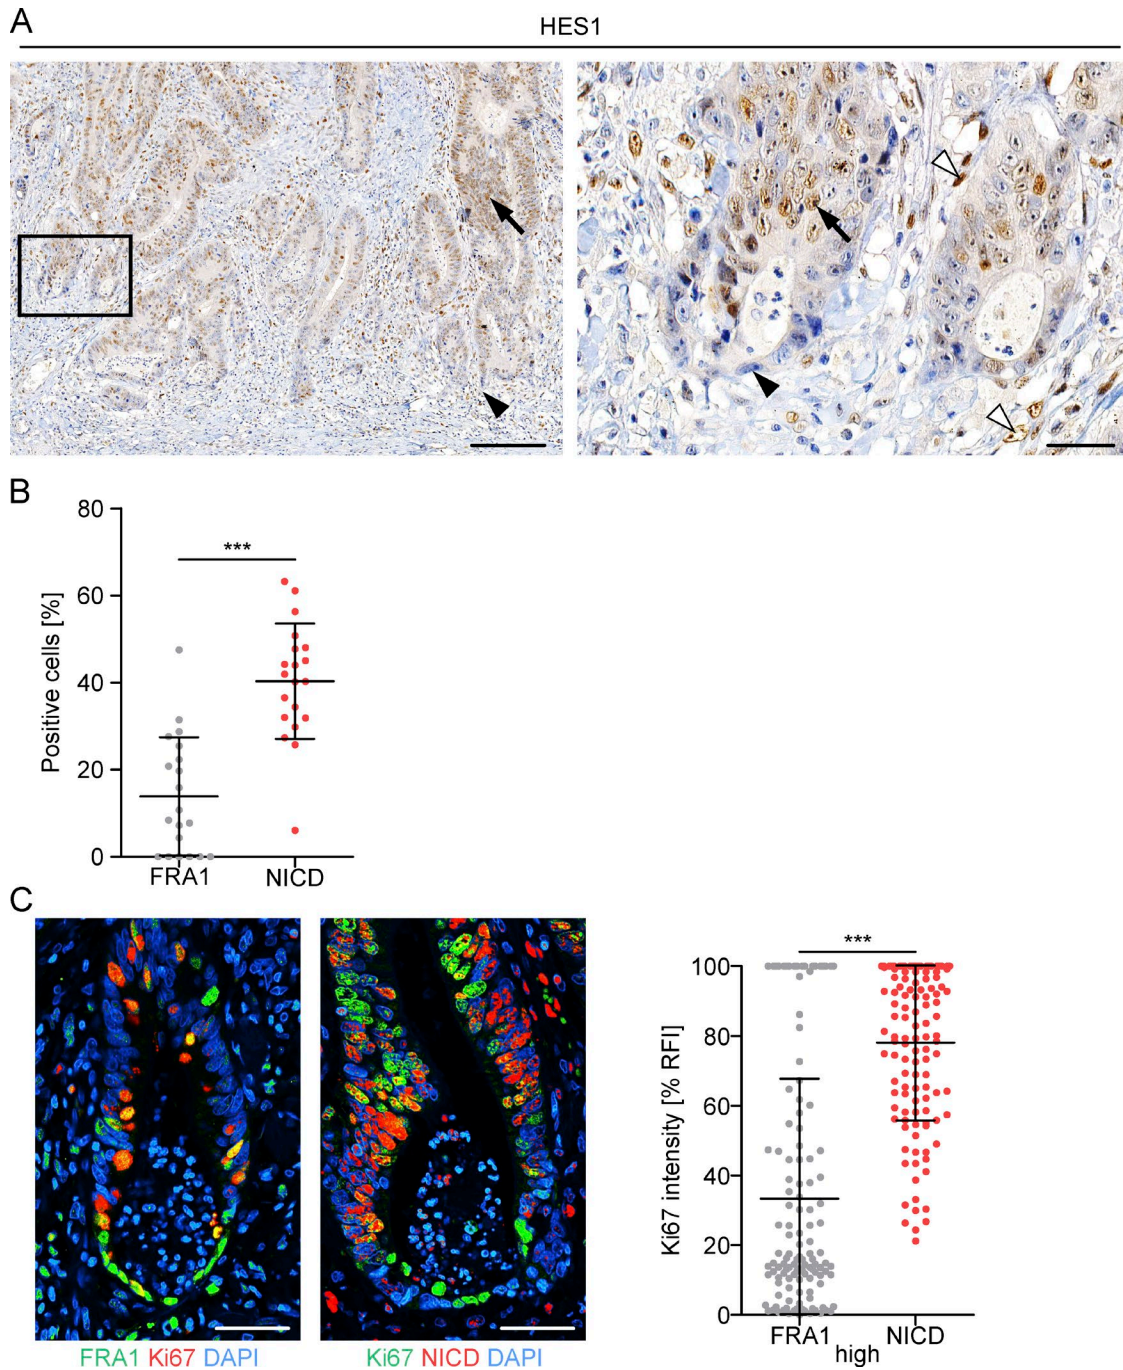

Figure S1. **Distribution of HES1 expression and characteristics of FRA1- and NICD-positive tumor cells in colorectal cancer.** (A) Representative immunostaining for HES1 in primary colon cancer tissue. Right panel shows higher magnification of area boxed in the left panel. Arrowheads indicate tumor cells at the leading tumor edge, and arrows indicate tumor cells toward the tumor center; open arrowheads indicate endothelial cells. (B) Quantification of FRA1- and NICD-positive tumor cells in  $n = 20$  different primary colon cancers. (C) Double immune fluorescence (left panels) and quantification of co-immune fluorescence signals (right panel) for Ki67 and FRA1 or NICD. Relative fluorescence intensities (% RFI) for Ki67 in individual tumor cells with high (upper quartile) FRA1 and NICD staining intensity are shown. Data are derived from  $n \geq 500$  tumor cells in  $n = 10$  different colorectal cancer cases. Error bars indicate mean  $\pm$  SD. \*\*\*,  $P < 0.001$  by  $t$  test. Bars: 200  $\mu\text{m}$  (A, left); 20  $\mu\text{m}$  (A, right); 50  $\mu\text{m}$  (C).

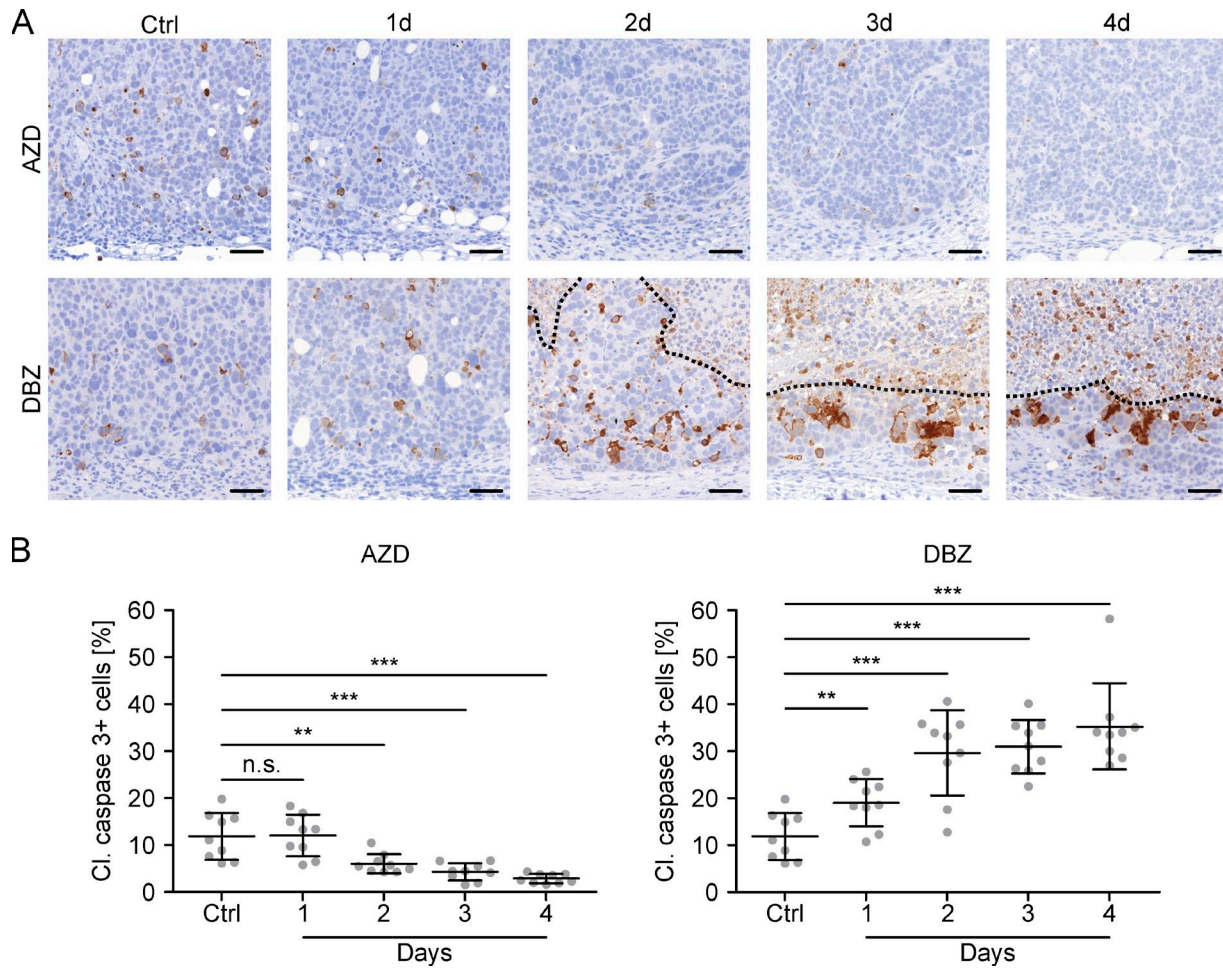

Figure S2. **Effects of short-term AZD and DBZ treatment on apoptosis in colon cancer xenografts. (A and B)** Representative immunostainings (A) and quantification (B) of cleaved (Cl.) caspase-3 in SW480 xenografts. Vehicle-treated tumors (Ctrl) and AZD- or DBZ-treated tumors at indicated time points were analyzed. Areas above dotted lines are tumor necrosis. Bars, 50  $\mu$ m. Error bars are mean  $\pm$  SD. \*\*,  $P < 0.01$ ; \*\*\*,  $P < 0.001$  by  $t$  test; n.s., not significant.  $n \geq 3$  independent biological replicates.

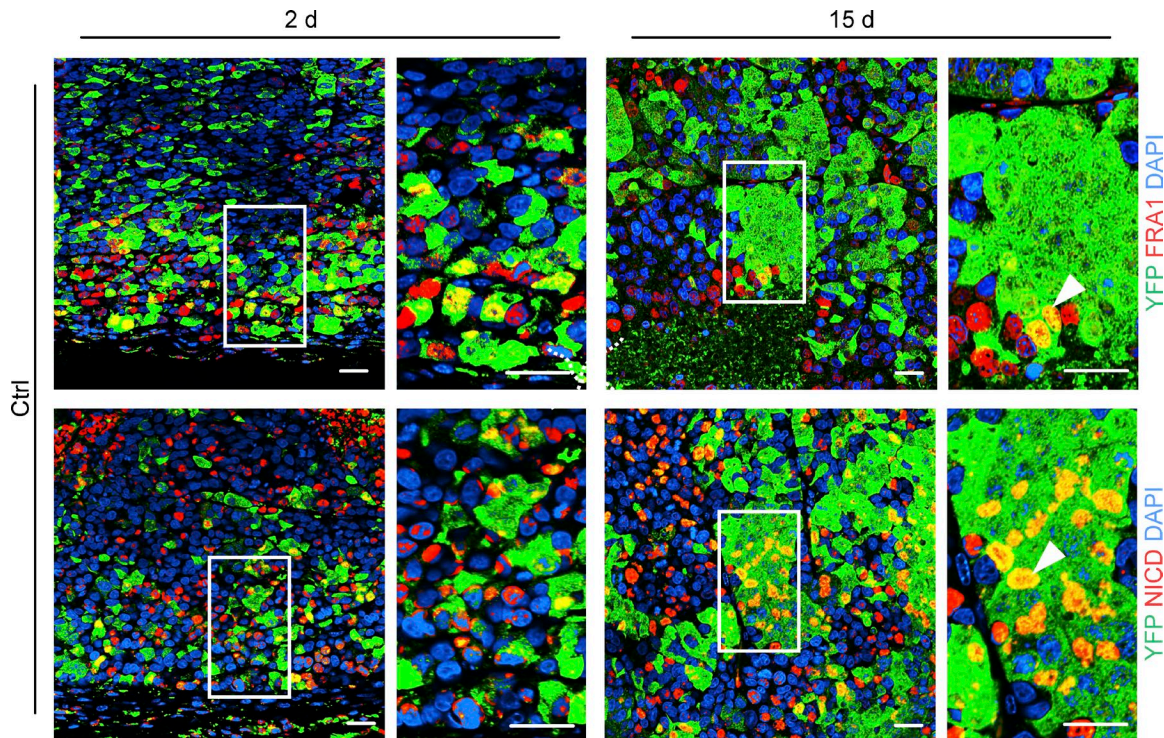

Figure S3. **Lineage tracing of tumor cells in control colon cancer xenografts.** Representative double immune fluorescence images for YFP, FRA1, and NICD at 2 and 15 d after recombination in vehicle (Ctrl)-treated SW480 xenografts, as indicated. Narrow panels are higher magnifications of areas boxed in squared panels. Arrowheads point to FRA1- and NICD-positive tumor cells within single YFP-positive clones at 15 d after recombination. Bars, 25  $\mu$ m.

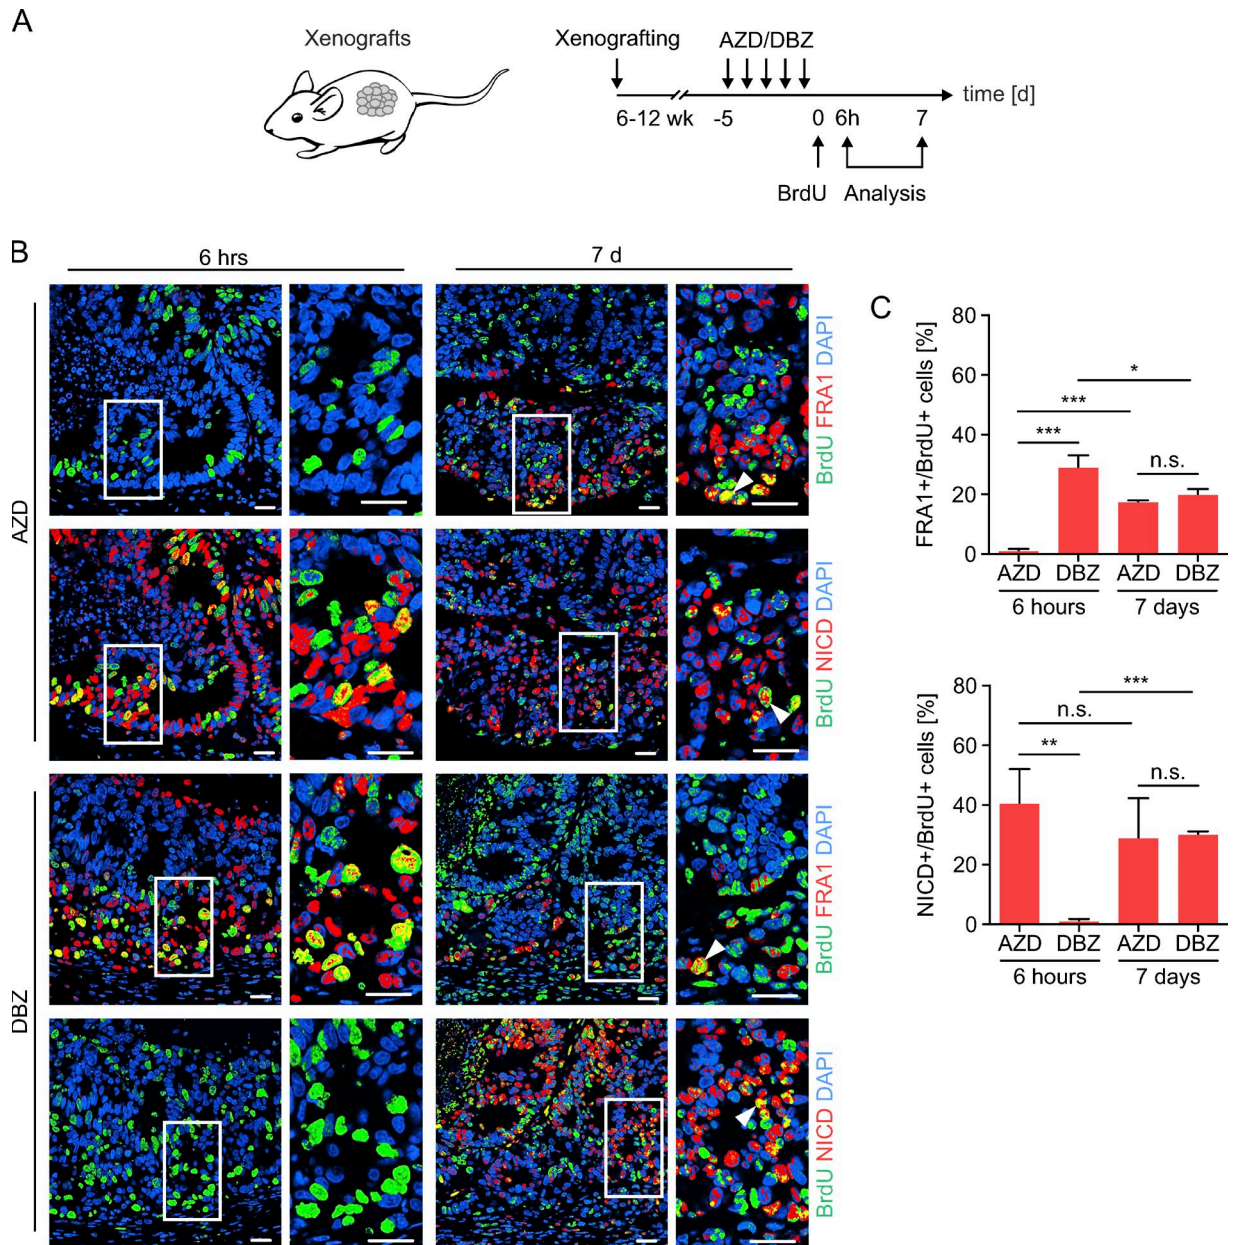

Figure S4. **BrdU tracing of colon cancer cells after MAPK and NOTCH inhibition.** (A) Schema and experimental schedule for BrdU pulse labeling and chasing in patient-derived PDX1 colon cancer xenografts that were treated with AZD or DBZ. (B) Double immune fluorescence for BrdU, FRA1, and NICD at indicated time points after BrdU pulse labeling. Arrowheads in right panels point to BrdU staining in reappeared FRA1- and NICD-positive tumor cells at 7 d. Narrow panels are higher magnifications of areas boxed in squared panels. Representative data from more than three biological replicates are shown. Bars, 25  $\mu$ m. (C) Quantification of FRA1-/BrdU- and NICD-/BrdU-double positive tumor cells in AZD- and DBZ-treated SW480 xenografts at indicated time points after BrdU pulse labeling. Data are mean and error bars indicate SD. \*,  $P < 0.05$ ; \*\*,  $P < 0.01$ ; \*\*\*,  $P < 0.001$  by  $t$  test; n.s., nonsignificant.  $n \geq 3$  independent biological replicates.

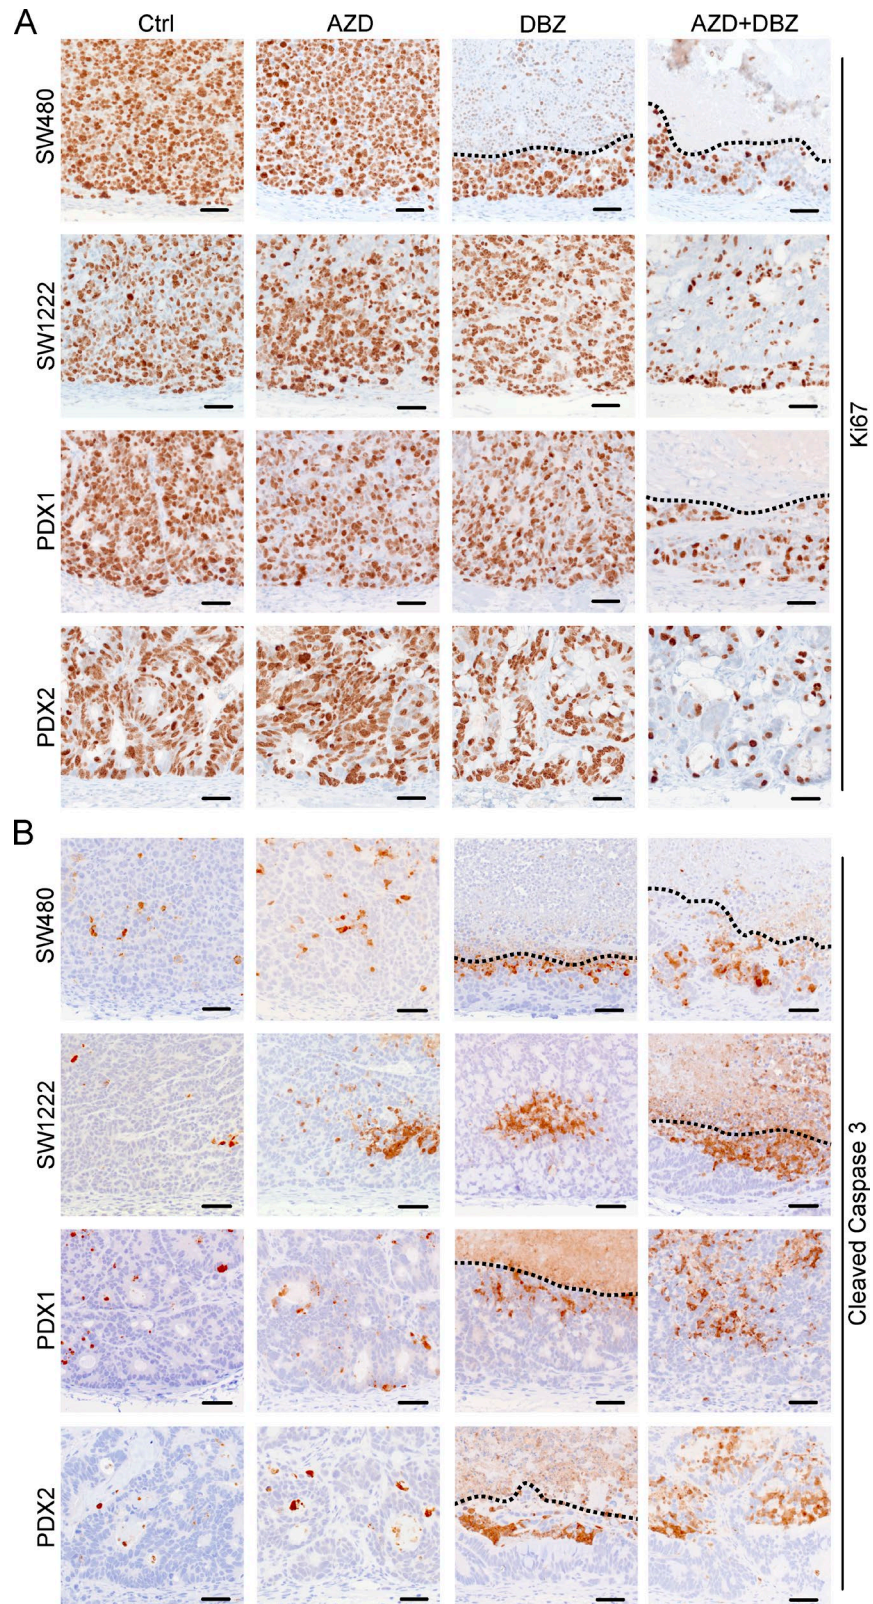

Figure S5. **Impact of long term MAPK and NOTCH repression on proliferation and apoptosis in colon cancer xenografts. (A and B)** Representative immunostainings of Ki67 (A) and cleaved caspase-3 (B) in SW480-, SW1222-, and patient derived-PDX1 and PDX2 colon cancer xenografts after treatment with vehicle (Ctrl), AZD, and/or DBZ. Bars, 50 μm.

Table S1. Clinical data of FRA1 and NICD expression in UICC stage II colorectal cancer.

| Characteristics    | Total | FRA1      |            |       | NICD      |            |       | FRA1/NICD combination |            |        |
|--------------------|-------|-----------|------------|-------|-----------|------------|-------|-----------------------|------------|--------|
|                    |       | Negative  | Positive   | P     | Low       | High       | P     | Negative/low          | Others     | P      |
| All patients       | 225   | 53 (23.6) | 172 (76.4) |       | 51 (22.7) | 174 (77.3) |       | 20 (8.9)              | 205 (91.1) |        |
| Age (y, median 69) |       |           |            |       |           |            |       |                       |            |        |
| ≤68                | 112   | 29 (25.9) | 83 (74.1)  | 0.411 | 24 (21.4) | 88 (78.6)  | 0.659 | 10 (8.9)              | 102 (91.1) | 0.983  |
| ≥69                | 113   | 24 (21.2) | 89 (78.8)  |       | 27 (23.9) | 86 (76.1)  |       | 10 (8.8)              | 103 (91.2) |        |
| Gender             |       |           |            |       |           |            |       |                       |            |        |
| Male               | 121   | 33 (27.3) | 88 (72.7)  | 0.156 | 27 (22.3) | 94 (77.7)  | 0.892 | 11 (9.1)              | 110 (90.9) | 0.909  |
| Female             | 104   | 20 (19.2) | 84 (80.8)  |       | 24 (23.1) | 80 (76.9)  |       | 9 (8.7)               | 95 (91.3)  |        |
| T-stage (UICC)     |       |           |            |       |           |            |       |                       |            |        |
| T3                 | 186   | 41 (22.0) | 145 (78.0) | 0.243 | 43 (23.1) | 143 (76.9) | 0.724 | 16 (8.6)              | 170 (91.4) | 0.741  |
| T4                 | 39    | 12 (30.8) | 27 (69.2)  |       | 8 (20.5)  | 31 (79.5)  |       | 4 (10.3)              | 35 (89.7)  |        |
| Tumor grade        |       |           |            |       |           |            |       |                       |            |        |
| Low grade          | 201   | 42 (20.9) | 159 (79.1) | 0.007 | 40 (19.9) | 161 (80.1) | 0.004 | 13 (6.5)              | 188 (93.5) | <0.001 |
| High grade         | 24    | 11 (45.8) | 13 (54.2)  |       | 11 (45.8) | 13 (54.2)  |       | 7 (29.2)              | 17 (70.8)  |        |
| KRAS Exon 2        |       |           |            |       |           |            |       |                       |            |        |
| Wild type          | 139   | 38 (27.3) | 101 (72.7) | 0.089 | 34 (24.5) | 105 (75.5) | 0.414 | 14 (10.1)             | 125 (89.9) | 0.428  |
| Mutated            | 86    | 15 (17.4) | 71 (82.6)  |       | 17 (19.8) | 69 (80.2)  |       | 6 (7.0)               | 80 (93.0)  |        |

Row percent values are given in parentheses. P-values indicate  $\chi^2$  test results.

Table S2. Multivariate analysis of disease free survival in UICC stage II colorectal cancer

| Variables                                       | Disease free survival |                           |        |
|-------------------------------------------------|-----------------------|---------------------------|--------|
|                                                 | HR                    | (95% confidence interval) | P      |
| Age (≥ vs. < median)                            | 1.0                   | (0.64-1.66)               | 0.902  |
| Gender (F vs. M)                                | 1.0                   | (0.63-1.64)               | 0.938  |
| T-stage                                         | 2.9                   | (1.73-4.82)               | <0.001 |
| Tumor grade                                     | 0.8                   | (0.32-2.03)               | 0.642  |
| KRAS Exon 2 (mutated vs. wild type)             | 1.3                   | (0.78-2.04)               | 0.348  |
| FRA1/NICD combination (others vs. negative/low) | 9.9                   | (1.35-72.74)              | 0.024  |

Table S3. Clinical data of FRA1 and NICD expression in a case-control collection of colon cancers with and without distant metastasis

| Characteristics    | Total | FRA1      |           |       | NICD      |           |       | FRA1/NICD combination |            |       |
|--------------------|-------|-----------|-----------|-------|-----------|-----------|-------|-----------------------|------------|-------|
|                    |       | Negative  | Positive  | P     | Low       | High      | P     | Negative/low          | Others     | P     |
| All patients       | 92    | 22 (23.9) | 70 (76.1) |       | 13 (14.1) | 79 (85.9) |       | 5 (5.4)               | 87 (94.6)  |       |
| Age (y, median 68) |       |           |           |       |           |           |       |                       |            |       |
| ≤68                | 48    | 12 (25.0) | 36 (75.0) | 0.799 | 7 (14.6)  | 41 (85.4) | 0.896 | 4 (8.3)               | 44 (91.7)  | 0.200 |
| ≥69                | 44    | 10 (22.7) | 34 (77.3) |       | 6 (13.6)  | 38 (86.4) |       | 1 (2.3)               | 43 (97.7)  |       |
| Gender             |       |           |           |       |           |           |       |                       |            |       |
| Male               | 45    | 11 (24.4) | 34 (75.6) | 0.907 | 6 (13.3)  | 39 (86.7) | 0.830 | 2 (4.4)               | 43 (95.6)  | 0.682 |
| Female             | 47    | 11 (23.4) | 36 (76.6) |       | 7 (14.9)  | 40 (85.1) |       | 3 (6.4)               | 44 (93.6)  |       |
| T-stage (UICC)     |       |           |           |       |           |           |       |                       |            |       |
| T2                 | 8     | 1 (12.5)  | 7 (87.5)  | 0.369 | 1 (12.5)  | 7 (87.5)  | 0.640 | 1 (12.5)              | 7 (87.5)   | 0.437 |
| T3                 | 69    | 19 (27.5) | 50 (72.5) |       | 11 (15.9) | 58 (84.1) |       | 4 (5.8)               | 65 (94.2)  |       |
| T4                 | 15    | 2 (13.3)  | 13 (86.7) |       | 1 (6.7)   | 14 (93.3) |       | 0 (0.0)               | 15 (100.0) |       |
| Nodal status       |       |           |           |       |           |           |       |                       |            |       |
| N0                 | 39    | 14 (35.9) | 25 (64.1) | 0.021 | 8 (20.5)  | 31 (79.5) | 0.132 | 4 (10.3)              | 35 (89.7)  | 0.080 |
| N+                 | 53    | 8 (15.1)  | 45 (84.9) |       | 5 (9.4)   | 48 (90.6) |       | 1 (1.9)               | 52 (98.1)  |       |
| Metastasis (Liver) |       |           |           |       |           |           |       |                       |            |       |
| M0                 | 46    | 17 (37.0) | 29 (63.0) | 0.003 | 10 (21.7) | 36 (78.3) | 0.036 | 5 (10.9)              | 41 (89.1)  | 0.021 |
| M1                 | 46    | 5 (10.9)  | 41 (89.1) |       | 3 (6.5)   | 43 (93.5) |       | 0 (0.0)               | 46 (100.0) |       |
| Tumor grade        |       |           |           |       |           |           |       |                       |            |       |
| Low grade          | 30    | 6 (20.0)  | 24 (80.0) | 0.540 | 2 (6.7)   | 28 (93.3) | 0.153 | 1 (3.3)               | 29 (96.7)  | 0.536 |
| High grade         | 62    | 16 (25.8) | 46 (74.2) |       | 11 (17.7) | 51 (82.3) |       | 4 (6.5)               | 58 (93.5)  |       |

Row percent values are given in parentheses. P-values indicate  $\chi^2$  test results.

Table S4. **Primary antibodies used for immunoblotting (WB), immunohistochemistry (IHC), and immunofluorescence (IF)**

| <b>Antibody</b>                     | <b>Species</b> | <b>Manufacturer</b> | <b>WB</b> | <b>IF</b> | <b>IHC</b> |
|-------------------------------------|----------------|---------------------|-----------|-----------|------------|
| BrdU (IIB5)                         | Mouse          | Santa Cruz          |           | 1:100     |            |
| $\beta$ -catenin (610154)           | Mouse          | BD Biosciences      |           | 1:200     |            |
| Cleaved Caspase-3 (Asp175)          | Rabbit         | Cell Signaling      |           |           | 1:100      |
| Cleaved Notch1 (Val1744)            | Rabbit         | Cell Signaling      |           | 1:100     | 1:100      |
| E-cadherin (sc-8426)                | Mouse          | Santa Cruz          |           | 1:50      | 1:200      |
| E-cadherin (24E10)                  | Rabbit         | Cell Signaling      | 1:1,000   |           |            |
| FRA1 (sc-28310)                     | Mouse          | Santa Cruz          |           | 1:50      | 1:50       |
| GFP (4B10)                          | Mouse          | Cell Signaling      |           | 1:100     |            |
| GFP (2555S)                         | Rabbit         | Cell Signaling      |           | 1:100     |            |
| HES1 (D6P2U)                        | Rabbit         | Cell Signaling      | 1:1,000   |           | 1:50       |
| Ki67 (M7240)                        | Mouse          | Dako                |           |           | 1:150      |
| Ki67 (D2H10)                        | Rabbit         | Cell Signaling      |           | 1:100     |            |
| Laminin-5- $\gamma$ 2 (clone D4B5)  | Mouse          | Merck Millipore     |           | 1:200     |            |
| Phospho p44/42 MAPK (Thr202/Tyr204) | Rabbit         | Cell Signaling      | 1:1,000   |           |            |
| Tubulin (DM1A)                      | Mouse          | Sigma-Aldrich       | 1:50,000  |           |            |
| Vimentin (M0725)                    | Mouse          | Dako                |           |           | 1:150      |

Catalogue numbers and/or clones are given in parentheses.
